# Supplementary material
Source: PubMed Central journal article supplement (PMC4078128)
Supplement: 10-1055-s-0034-1368173-sup_gf764.pdf [file 10-1055-s-0034-1368173-sup_gf764.pdf]

# Subkutane Applikation monoklonaler Antikörper in der Onkologie

## Subcutaneous Administration of Monoclonal Antibodies in Oncology

### Autoren

C. Jackisch<sup>1</sup>, V. Müller<sup>2</sup>, C. Maintz<sup>3</sup>, S. Hell<sup>4</sup>, B. Ataseven<sup>5</sup>

### Institute

<sup>1</sup> Obstetrics and Gynecology, Sanaklinikum Offenbach, Offenbach  
<sup>2</sup> Klinik und Poliklinik für Gynäkologie, Universitätsklinikum Hamburg-Eppendorf, Hamburg  
<sup>3</sup> Hämatologisch-Onkologische Praxis, Würselen  
<sup>4</sup> Medizinisch-wissenschaftliche Beratung, Speyer  
<sup>5</sup> Klinik für Gynäkologie & Gynäkologische Onkologie, Kliniken Essen-Mitte, Essen

### Schlüsselwörter

- monoklonale Antikörper
- subkutane Therapie
- Mammakarzinom
- Trastuzumab
- Onkologie

### Key words

- monoclonal antibodies
- subcutaneous therapy
- breast cancer
- trastuzumab
- oncology

**eingereicht** 5. 12. 2013  
**revidiert** 20. 1. 2014  
**akzeptiert** 2. 2. 2014

### Bibliografie

**DOI** <http://dx.doi.org/10.1055/s-0034-1368173>  
 Geburtsh Frauenheilk 2014; 74:  
 1–7 © Georg Thieme Verlag KG  
 Stuttgart · New York ·  
 ISSN 0016-5751

### Korrespondenzadresse

**Prof. Dr. Christian Jackisch**  
 Sanaklinikum Offenbach  
 Obstetrics and Gynecology  
 Starckenburgring 66  
 63069 Offenbach  
[christian.jackisch@sana.de](mailto:christian.jackisch@sana.de)

### Zusammenfassung

Die Behandlung mit monoklonalen Antikörpern (mAK) ist ein fester Bestandteil der onkologischen Therapie geworden. Die dafür zur Verfügung stehenden monoklonalen Antikörper werden überwiegend intravenös, individualisiert gewichtsadaptiert und über längere Behandlungszeiträume verabreicht. Bei anderen chronischen Erkrankungen wie bspw. Diabetes mellitus stellt die subkutane Applikation von Medikamenten eine etablierte Therapieform dar. Für die subkutane Applikation größerer Volumina stellt die Physiologie der extrazellulären Matrix des subkutanen Gewebes ein Hindernis dar, wie sie für die Lösung mAK erforderlich ist. Die Koformulierung mit rekombinanter humaner Hyaluronidase ermöglicht die schmerzarme Gabe größerer Volumina und damit die subkutane Applikation von monoklonalen Antikörpern, wie die Entwicklung einer subkutanen Formulierung für Trastuzumab zeigt. Mit dieser steht Patientinnen mit HER2-positivem Mammakarzinom eine weniger invasive, zeitoptimierte und flexiblere Applikationsform zur Verfügung, die mit einer fixen Dosierungsmöglichkeit zur Therapiesicherheit beiträgt. Das Beispiel Trastuzumab zeigt, dass die subkutane Verabreichung monoklonaler Antikörper die onkologische Langzeittherapie sowohl für Patienten als auch für medizinisches Fachpersonal vereinfachen könnte.

### Einleitung

Die Optimierung onkologischer Therapien führt bei einer Vielzahl von Tumorentitäten im fortgeschrittenen Stadium zu einer deutlichen Lebensverlängerung. Somit kommt dieser chronischen Phase der Erkrankung eine ganz andere Bedeutung zu. Nach Angaben der Deutschen Krebsgesellschaft leben 5 Jahre nach der Diag-

### Abstract

Treatment with monoclonal antibodies (mabs) has become an established component of oncological therapy. The monoclonal antibodies available for this purpose are mainly administered intravenously in individually adapted doses according to body weight over longer treatment times. For other chronic diseases such as, for example, diabetes mellitus, the subcutaneous administration of drugs is an established therapy option. For the subcutaneous administration of larger volumes as needed for mab solutions the extracellular matrix of the subcutaneous tissue represents a problem. The co-formulation with recombinant human hyaluronidase makes the relatively pain-free administration of larger fluid volumes and thus the subcutaneous administration of monoclonal antibodies possible, as illustrated by the development of a subcutaneous formulation of trastuzumab. This constitutes a less invasive, time-optimised and flexible form of administration for patients with HER2-positive breast cancer that, with its fixed dosing possibilities, contributes to therapeutic safety. The example of trastuzumab shows that the subcutaneous administration of monoclonal antibodies can simplify oncological long-term therapy not only for the patients but also for the medical personnel.

nosestellung eines Mammakarzinoms noch 81% der Patientinnen. Von den Patientinnen mit fortgeschrittenem Mammakarzinom leben nach dem 1. Auftreten von Metastasen etwa ein Drittel noch 5 Jahre, jede 10. Betroffene mehr als 10 Jahre [1]. Monoklonale Antikörper sind heute fester Bestandteil der onkologischen Therapie. Ihre Anwendung erfolgt überwiegend intravenös über längere Behandlungszeiträume von bis zu meh-

**Tab. 1** Vor- und Nachteile von subkutaner und intravenöser Applikation.

| Applikationsform | Vorteile                                                                                                                                                                                                                              | Herausforderungen                                                                                                                                                                                                                                                                                                                                              |
|------------------|---------------------------------------------------------------------------------------------------------------------------------------------------------------------------------------------------------------------------------------|----------------------------------------------------------------------------------------------------------------------------------------------------------------------------------------------------------------------------------------------------------------------------------------------------------------------------------------------------------------|
| s. c.            | <ul style="list-style-type: none"> <li>▶ kürzerer Klinik-/Praxisaufenthalt für die Patienten</li> <li>▶ optimierte Ressourcennutzung</li> <li>▶ Selbstapplikation möglich</li> <li>▶ weniger invasiv als i. v. Applikation</li> </ul> | <ul style="list-style-type: none"> <li>▶ schmerzfreie Applikation größerer Volumina</li> <li>▶ Minimierung unerwünschter Reaktionen an der Injektionsstelle</li> <li>▶ Gewährleistung einer guten Resorption und Bioverfügbarkeit</li> <li>▶ Applikation exakter Dosen erfordert Übung</li> </ul>                                                              |
| i. v.            | <ul style="list-style-type: none"> <li>▶ geeignet für Substanzen, die Irritationen hervorrufen können</li> <li>▶ geeignet für Arzneimittel, die in großen Volumina appliziert werden müssen</li> </ul>                                | <ul style="list-style-type: none"> <li>▶ erfordert geschultes Personal in spezieller Infusionsumgebung</li> <li>▶ Umgang mit Portsystemen (z. B. zentraler Port, Hickman-Katheter, PICC)</li> <li>▶ Legen einer peripheren Kanüle</li> <li>▶ längerer Klinik-/Praxisaufenthalt als bei s. c. Applikation</li> <li>▶ Risiko systemischer Infektionen</li> </ul> |

renen Jahren. Für die onkologische Therapie mit mAK würde eine weniger invasive, vom Zeitaufwand für medizinisches Personal und Patientinnen her signifikant reduzierte und flexiblere Verabreichungsform, wie sie die subkutane Applikation darstellt, eine relevante Verbesserung der Lebensqualität der Patienten bedeuten, die in dieser Erkrankungsphase bereits häufig in den Alltag ihres Lebens zurückgekehrt sind. Sie müssten weniger Zeit als Patient im Behandlungszentrum verbringen, könnten die so gewonnene Lebenszeit selbstbestimmter nutzen und würden eine bisher nicht gekannte soziale Unabhängigkeit gewinnen. Die subkutane Applikation würde die Therapie mit monoklonalen Antikörpern sowohl für Patient als auch für medizinisches Fachpersonal vereinfachen (► **Tab. 1**). Letztlich wäre sogar die häusliche Selbstapplikation vorstellbar.

## Material und Methodik

Der Artikel basiert auf Recherchen zur Anwendung von monoklonalen Antikörpern bei onkologischen Krankheitsbildern in PubMed, MEDLINE, Clinicaltrials.gov und Beurteilungsberichten der Europäischen Arzneimittelbehörde EMA ohne Einschränkung des Suchzeitraums sowie einer selektiven Recherche von Kongressabstrakts des Annual Meeting der American Society of Clinical Oncology (ASCO), Annual Meeting der American Society of Hematology (ASH), des San Antonio Breast Cancer Symposiums, der St. Gallen Breast Cancer Conference bis einschließlich 2009. Zudem wurden mehrere Übersichtsartikel und deren Quellen gesichtet.

### Daten zur subkutanen Applikation monoklonaler Antikörper aus klinischen Studien in der Onkologie

Die PubMed-Recherche (Stichworte [antibody or antibodies] and monoclonal and cancer and subcutaneous, keine Einschränkung des Suchzeitraums) ergab nach Auswertung der Abstracts aller 945 Treffer und einer nachfolgenden gezielten Suche für die zuvor identifizierten Antikörper 70 Publikationen, in denen über die subkutane Applikation von monoklonalen Antikörpern als onkologische Therapeutika beim Menschen berichtet wurde (Alemtuzumab × 33, Denosumab × 30, Trastuzumab × 1, Rituximab × 1, Veltuzumab × 1, Abagovomab × 4).

Veltuzumab, ein gegen CD20 gerichteter Antikörper, und Abagovomab, ein monoklonaler, muriner, gegen CA125 gerichteter Antikörper, sind noch in der klinischen Entwicklung.

Für Alemtuzumab (MabCampath®), einen gegen CD52 gerichteten Antikörper, legten zwar Studien eine vergleichbare Wirksamkeit für die intravenöse und die subkutane Applikation nahe [2,

3]. Zugelassen war Alemtuzumab allerdings bis zu seiner Marktrücknahme 2012 durch die Herstellerfirma Genzyme aufgrund der klinischen Entwicklung als Arzneimittel für Patienten mit Multipler Sklerose nur zur intravenösen Anwendung bei Patienten mit chronisch lymphatischer Leukämie [4].

Für Rituximab (MabThera®), den ersten therapeutischen Antikörper gegen das CD20-Antigen auf der Oberfläche normaler und maligner B-Zellen, wird derzeit eine subkutane Anwendung entwickelt [5,6]. Für die subkutane Darreichungsform von Trastuzumab (Herceptin®), einen gegen HER2 gerichteten Antikörper zur Therapie von HER2-positivem metastasiertem und frühem Mammakarzinom sowie HER2-positivem metastasiertem Magenkarzinom liegt seit August 2013 eine Zulassung der europäischen Arzneimittelbehörde EMA als Therapie von Patientinnen mit HER2-positivem Mammakarzinom vor [7].

Denosumab (Xgeva®), ein Antikörper gegen RANK-L zur Reduktion von knochenbezogenen Komplikationen bei Patienten mit einem ossär metastasierten soliden Tumor, ist konsequent als subkutan zu applizierender Antikörper entwickelt worden. Die Zulassung beruht auf der signifikanten Verringerung des Risikos skelettbezogener Ereignisse im Vergleich zur Therapie mit Zoledronat in 3 großen Phase-III-Studien, eine mit 2046 Patientinnen mit fortgeschrittenem Mammakarzinom [8], eine mit 1901 Patienten mit kastrationsresistentem Prostatakarzinom [9] und eine mit 1776 Patienten mit verschiedenen soliden Tumorentitäten (mit Ausnahme von Mamma- und Prostatakarzinom) und multiplem Myelom [10]. In einer weiteren placebokontrollierten Studie mit 1432 Patienten mit kastrationsresistentem Prostatakarzinom wurde mit Denosumab eine signifikante Verlängerung des knochenmetastasenfreien Überlebens und eine signifikante Verzögerung des Auftretens von Knochenmetastasen erreicht [11].

Es stellt sich die Frage, weshalb den Patienten kaum subkutane Darreichungsformen zur Verfügung stehen (► **Tab. 2**), obwohl sich die Therapie mit monoklonalen Antikörpern über längere Behandlungszeiträume zu einer Säule der modernen onkologischen Therapie entwickelt hat. Am Beispiel von Trastuzumab lassen sich die Herausforderungen für die Entwicklung einer alternativen subkutanen Formulierung exemplarisch beschreiben.

### Therapie von Patientinnen mit HER2-positivem Mammakarzinom mit Trastuzumab

Eine Therapie mit Trastuzumab, einem monoklonalen Antikörper gegen den humanen epidermalen Wachstumsfaktorrezeptor HER2, ist heute Standard in der Behandlung von Patientinnen mit einem HER2-positiven Mammakarzinom [12–14] und hat

**Tab. 2** Monoklonale Antikörper mit klinischen Daten zur subkutanen Anwendung als onkologische Therapeutika.

| Name                      | Antikörper                                                | Zulassungsstatus als onkologisches Therapeutikum                                                                                                                                                                                                                                                          |
|---------------------------|-----------------------------------------------------------|-----------------------------------------------------------------------------------------------------------------------------------------------------------------------------------------------------------------------------------------------------------------------------------------------------------|
| Abagovomab                | muriner monoklonaler Antikörper gegen CA125               | in klinischer Entwicklung als <b>subkutane</b> Anwendung bei Ovarialkarzinom                                                                                                                                                                                                                              |
| Veltuzumab                | humanisierter monoklonaler Antikörper gegen CD20          | in klinischer Entwicklung als <b>subkutane</b> Anwendung bei Non-Hodgkin-Lymphomen                                                                                                                                                                                                                        |
| Alemtuzumab (MabCampath®) | humanisierter Antikörper gegen CD52                       | bis August 2012 zugelassen zur <b>intravenösen</b> Therapie von chronisch lymphatischer Leukämie, Marktrücknahme wg. klinischer Entwicklung für Therapie der Multiplen Sklerose                                                                                                                           |
| Rituximab (MabThera®)     | chimärer (murin/human) monoklonaler Antikörper gegen CD20 | zugelassen zur <b>intravenösen</b> Therapie bei follikulärem Lymphom (nach Induktionschemotherapie und refraktär auf oder rezidivierend nach Chemotherapie), CD20-pos. diffusen großzelligem B-Zell-Non-Hodgkin-Lymphom, chronisch lymphatische Leukämie (nicht vorbehandelt und rezidivierend/refraktär) |
| Trastuzumab (Herceptin®)  | humanisierter monoklonaler Antikörper gegen HER2          | zugelassen für die <b>intravenöse</b> Therapie von HER2-positivem metastasiertem Brustkrebs, HER2-positivem frühem Brustkrebs, HER2-positivem metastasiertem Magenkarzinom; zugelassen für die <b>subkutane</b> Therapie von HER2-positivem Brustkrebs                                                    |
| Denosumab (Xgeva®)        | humane monoklonaler Antikörper gegen RANK-Ligand          | zugelassen als <b>subkutane</b> Therapie zur Verhinderung knochenbezogener Komplikationen bei soliden Tumoren und Knochenbefall                                                                                                                                                                           |

die Prognose der Patientinnen sowohl im Frühstadium als auch in der metastasierten Situation erheblich verbessert [15, 16].

Patientinnen mit einem frühen Mammakarzinom erhalten Trastuzumab als adjuvante Therapie über insgesamt 12 Monate alle 3 Wochen. Patientinnen mit metastasiertem Mammakarzinom erhalten Trastuzumab in der Regel mindestens bis zur Progression oder als „Treatment beyond progression“ auch darüber hinaus. Für die zusätzliche Gabe von Trastuzumab zu Standardchemotherapie wurden in randomisierten Phase-III-Studien mediane progressionsfreie Intervalle von 7,1 Monaten [17] bis zu 11,1 Monaten [18], in randomisierten Phase-II-Studien von bis zu 18,6 Monaten berichtet [19]. Nach den Therapieempfehlungen der Organkommission Mamma der Arbeitsgemeinschaft Gynäkologische Onkologie (AGO) und der European Society of Medical Oncology (ESMO) kann eine Therapie mit Trastuzumab auch noch über die Progression hinaus, also insgesamt über einen noch längeren Zeitraum, erfolgen [13, 14].

Trastuzumab wurde bisher exklusiv intravenös verabreicht. Nach der gültigen, auf den Ergebnissen der Zulassungsstudien beruhenden Fachinformation beträgt die Infusionsdauer der 1. Dosis dabei 90 min mit einer Nachbeobachtungszeit von 6 h ab Beginn der Infusion, die der folgenden Infusionen 30 min, gefolgt von einer Nachbeobachtungszeit von 2 h ab Beginn der Infusion [20]. In der Praxis mögen die realen Infusionszeiten abhängig von der Entscheidung der behandelnden Ärzte kürzer oder länger sein als die zuvor genannten. In der Regel ist die intravenöse Therapie in der Phase der chronischen Erkrankung jedoch mit einem nicht unerheblichen Zeitaufwand, verglichen mit der eigentlichen Therapiedauer, verbunden.

### Injektionsvolumina und die extrazelluläre Matrix des subkutanen Gewebes

Der monoklonale Antikörper Denosumab wird alle 4 Wochen in einer Dosierung von 120 mg als subkutane Injektion in einem Injektionsvolumen von 1,7 ml verabreicht [21]. Meist erfordert die Lösung monoklonaler Antikörper jedoch größere Injektionsvolumina. So beträgt das Infusionsvolumen der rekonstituierten Lösung von Trastuzumab bei einer Dosierung von 6 mg/kg für eine Patientin mit 70 kg Körpergewicht 20 ml für die intravenöse Anwendung. Eine höhere Konzentration der Lösung und damit eine Reduktion des Injektionsvolumens ist nur bedingt möglich. Selbst bei der maximal möglichen Konzentration der Injektionslösung von Trastuzumab von 120 mg/ml [22] anstatt der üblichen

21 mg/ml liegt das erforderliche Injektionsvolumen noch immer deutlich über 2 ml.

Die extrazelluläre Matrix des Subkutangewebes limitiert die Injektion größerer Volumina (> 1–2 ml). Sie ist ein strukturelles Netzwerk von Faserproteinen wie Kollagen und Elastin in einem viskös-elastischen Gel, das aus Hyaluronsäure und anderen Glykosaminoglykanen, komplexen linearen Polysacchariden, besteht. Dieses Netzwerk ist wichtig für die spezifische Gewebearchitektur und kontrolliert die Diffusion und den Fluss von Molekülen. Kollagen und Hyaluronsäure bilden die maßgebliche Volumenbarriere (☛ Abb. 1) [23]. Die Injektion größerer Volumina als 2 ml ist für den Patienten schmerzhaft. Außerdem können aufgrund der Viskosität der extrazellulären Matrix größere Moleküle wie z. B. Proteine im Gewebe zurückgehalten werden. Dies kann zum lokalen Abbau dieser Substanzen, zu lokalen Reaktionen an der Injektionsstelle und zu einer geringeren Bioverfügbarkeit führen [23]. Die Physiologie der extrazellulären Matrix des Subkutangewebes stellt daher gerade für monoklonale Antikörper ein Hindernis für die subkutane Applikation dar.

Im Falle von Trastuzumab wurde mithilfe der ENHANZE™-Technologie, die nachfolgend erläutert wird, eine problemlose und schmerzfreie subkutane Anwendung ermöglicht.

### Koformulierung mit rekombinanter Hyaluronidase

Die Halbwertszeit von Hyaluronsäure beträgt 15–20 h. Sie unterliegt dem hydrolytischen Abbau durch das Enzym Hyaluronidase. Zur Überwindung der durch die extrazelluläre Matrix bedingten Volumenbegrenzung wurde für die subkutane Anwendung von Trastuzumab deshalb eine Koformulierung mit rekombinanter Hyaluronidase (rHuPH20) gewählt. Dieses Enzym bewirkt eine reversible Hydrolyse von Hyaluronsäure und vermindert so die Viskosität der gelartigen extrazellulären Matrix. Dies führt zu einer Erhöhung der Permeabilität. Die subkutane Dispersionsfläche nimmt zu und erlaubt die Applikation größerer Flüssigkeitsvolumina. Aufgrund der Halbwertszeit von Hyaluronsäure sind die strukturellen Veränderungen der extrazellulären Matrix nur temporär [23, 24]. Das menschliche PH-20-Gen codiert für eine bei neutralem pH-Wert aktive Hyaluronidase, die Glykosaminoglykane unter physiologischen Bedingungen degradiert. Das Klonen der cDNA der löslichen Domäne dieser humanen PH-20-Hyaluronidase ermöglichte die rekombinante Herstellung eines glykosylierten Enzyms in einer aufgereinigten homogenen Präparation mit hoher spezifischer Aktivität. Moleküle von einer

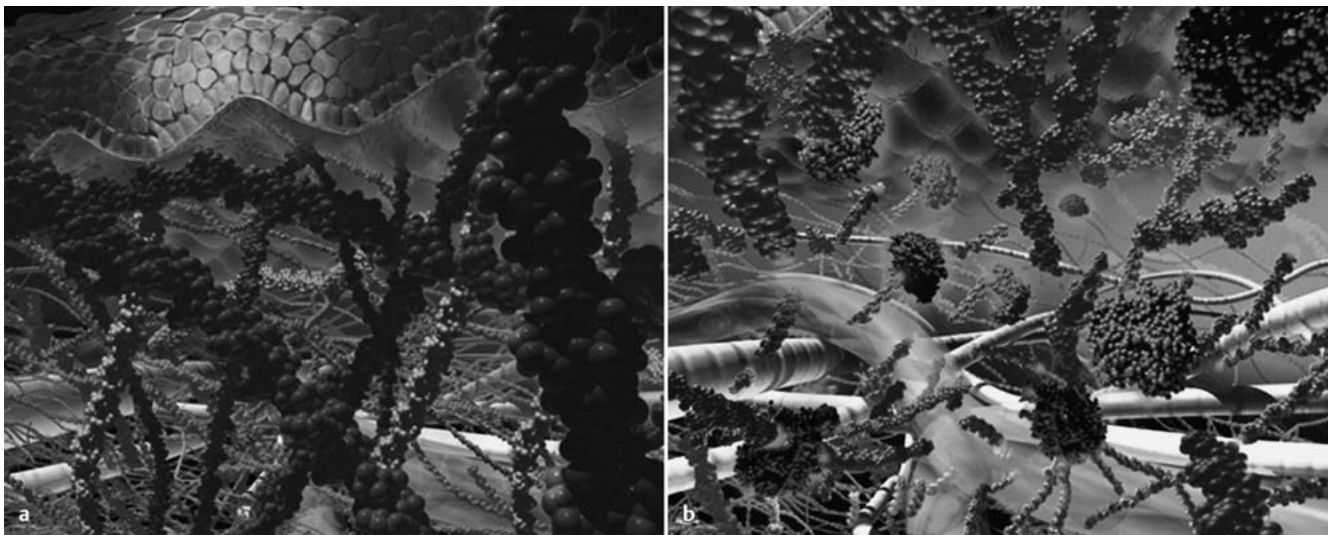

**Abb. 1 a und b** Prinzip der subkutanen Applikation unter Verwendung rekombinanter humaner Hyaluronidase als Trägerstoff. **a** Das subkutane Gewebe begrenzt mit seiner Matrix aus Hyaluronsäure und Kollagenfasern die subkutane Applikation auf Volumen < 2 ml. **b** Die temporäre und lokale De-

gradation von Hyaluronsäure durch rekombinante humane Hyaluronidase führt zu einer temporären Zunahme der subkutanen Dispersionsfläche und ermöglicht die Applikation großer Flüssigkeitsvolumina (Quelle: F. Hoffmann-La Roche).

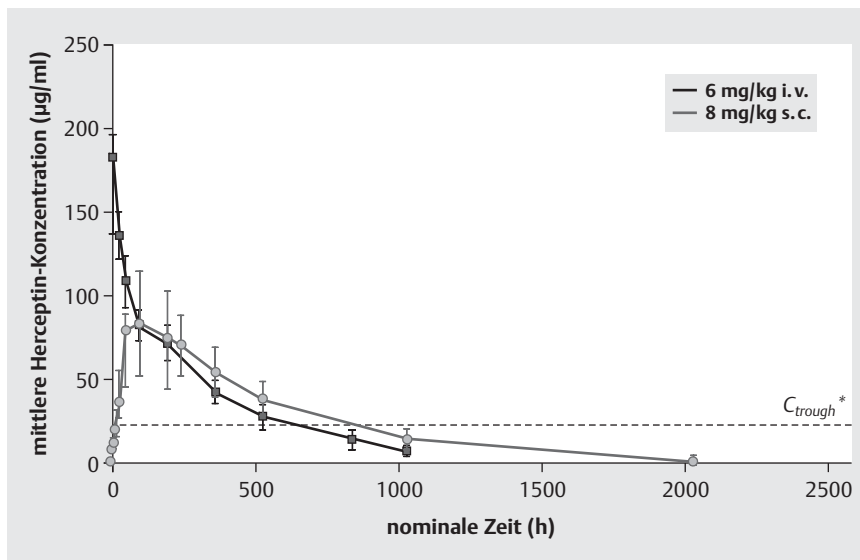

**Abb. 2** Trastuzumab-Exposition bei Patientinnen mit HER2-positivem frühem Mammakarzinom für die Dosierungen 8 mg/kg s.c. und 6 mg/kg i.v. (Nach Wynne et al. [27]). \* Die  $C_{\text{trough}}$  von 20 µg/ml bildet die in präklinischen Xenograft-Modellen etablierte Zielgröße ab.

Größe bis zu 200 nm wurden bei Koinjektion mit rHuPH20 gleichmäßig verteilt und zeigten eine signifikant erhöhte systemische Bioverfügbarkeit ähnlich der mit intravenöser Applikation erreichbaren [23, 25, 26].

### Dosisfindung für Trastuzumab subkutan

Eine alternative subkutane Applikation eines Medikaments muss im Vergleich zu dessen etablierter intravenöser Darreichungsform eine vergleichbare Wirksamkeit, Pharmakokinetik und Sicherheit bieten. In einer Dosisfindungsstudie an gesunden männlichen Probanden und Patientinnen mit HER2-positivem Mammakarzinom resultierte die Dosierung von Trastuzumab 8 mg/kg s.c. alle 3 Wochen in einer vergleichbaren Exposition wie die 3-wöchentliche Gabe von 6 mg/kg Trastuzumab i.v. (► **Abb. 2**). Damit konnten Minimal- oder Talkonzentrationen unmittelbar vor der nächsten Gabe von Trastuzumab ( $C_{\text{trough}}$ ) erreicht werden,

die mindestens so hoch waren wie die nach intravenöser Anwendung [27].

### Entwicklung einer fixen Dosierung von Trastuzumab

Um eine möglichst einfache Handhabung und eine Reduktion von Fehlerquellen wie Dosierungsfehler zu gewährleisten, wurde für Trastuzumab eine vom Körpergewicht unabhängige fixe subkutane Dosierung angestrebt. Grundlage der Wirksamkeit von Trastuzumab ist eine Sättigung der Rezeptoren, die eine Mindestkonzentration von Trastuzumab im Serum erfordert. Zur Aufrechterhaltung der Wirksamkeit von Trastuzumab muss die für die Sättigung der Rezeptoren erforderliche Serumkonzentration kontinuierlich über einem Mindestniveau gehalten werden [22, 28]. Bei der intravenösen Gabe von Trastuzumab wird diese Rezeptorsättigung schneller mit der höheren Initialdosis erreicht [22]. Auch mit einer fixen Dosierung sollte ab Zyklus 1 eine Sättigung der Rezeptoren gewährleistet sein. Die pharmakokineti-

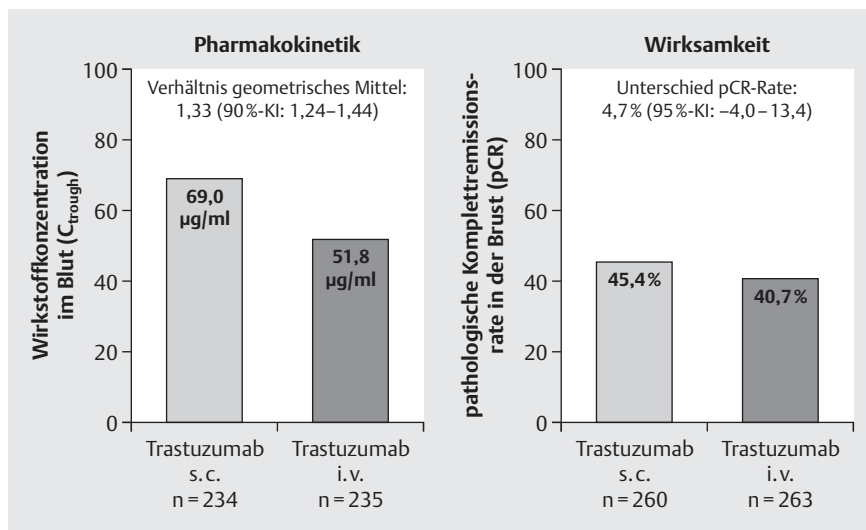

**Abb. 3** Ergebnisse für die koprimären Endpunkte für Trastuzumab s.c. vs. i.v. in der HannaH-Studie (Nach Ismael et al. [30]).

schen Eckdaten für verschiedene subkutane Dosierungen von Trastuzumab wurden mithilfe verschiedener Simulationen in einem Modell berechnet, in das die Daten der zuvor beschriebenen Dosisfindungstudie eingingen. Danach erreichte man mit einer Fixdosis von 600 mg s.c. eine ähnliche  $C_{\text{trough}}$  und eine mindestens gleichwertige Exposition mit Trastuzumab über ein Dosierungsintervall ( $AUC_{\text{tau}}$ ) wie mit der herkömmlichen 3-wöchentlichen und wöchentlichen i.v. Anwendung von Trastuzumab mit höherer Initialdosis. Eine adäquate Rezeptorsättigung war mit der Fixdosis von 600 mg s.c. bereits ab Zyklus 1 erreicht [22,29].

### Randomisierter Vergleich von Pharmakokinetik und Wirksamkeit

Die subkutane Applikation der fixen Dosis von 600 mg Trastuzumab in 5 ml Injektionsvolumen (Trastuzumab 120 mg/ml, rHuPH20 2000 U/ml) kann innerhalb von 2–5 Minuten erfolgen. Sie wurde in der HannaH-Studie, einer randomisierten, offenen Phase-III-Studie bei 596 Patientinnen mit HER2-positivem frühem fortgeschrittenem oder inflammatorischem Mammakarzinom, mit der etablierten intravenösen Gabe verglichen [30]. Die Patientinnen erhielten eine neoadjuvante Chemotherapie aus 4 Zyklen Docetaxel (75 mg/m<sup>2</sup>; q3w) und 4 Zyklen FEC (Fluorouracil 500 mg/m<sup>2</sup>, Epirubicin 75 mg/m<sup>2</sup>, Cyclophosphamid 500 mg/m<sup>2</sup>; q3w). Zusätzlich wurde Trastuzumab entweder in der fixen Dosierung von 600 mg subkutan (n=297) oder intravenös (8 mg/kg Initialdosis, 6 mg/kg Erhaltungsdosis) (n=299) alle 3 Wochen verabreicht. Nach der Operation wurde bis zur Komplettierung von 18 Zyklen die Therapie mit Trastuzumab fortgeführt. Die Studie zeigte für beide Darreichungsformen von Trastuzumab eine ähnliche Pharmakokinetik und eine vergleichbare Wirksamkeit. Das geometrische Mittel der Talkonzentration  $C_{\text{trough}}$  lag bei 69,0 µg/ml in der Gruppe mit subkutaner Applikation, in der i.v. Gruppe bei 51,8 µg/ml. Mit 1,33 (90%-Konfidenzintervall 1,24–1,44) lag der Quotient der beiden Werte über der vorab definierten Nichtunterlegenheitsgrenze von 0,80 (● **Abb. 3**).

In der s.c. Gruppe hatten 45,4% der Patientinnen und in der i.v. Gruppe 40,7% eine pathologische Komplettremission (pCR). Der Unterschied zwischen beiden Gruppen von 4,7% (95%-Konfidenzintervall -4,0–13,4) zugunsten von Trastuzumab s.c. lag damit deutlich über der Nichtunterlegenheitsgrenze von -12,5% (● **Abb. 3**).

Die Inzidenz von unerwünschten Ereignissen vom Grad 3–5 war in beiden Gruppen ähnlich. Es gab allerdings mit 21% mehr schwerwiegende unerwünschte Ereignisse (SAEs) in der s.c. Gruppe im Vergleich zu 12% in der i.v. Gruppe. Dieser Unterschied war zum großen Teil durch die unterschiedliche Häufigkeit von SAEs der Kategorie Infektionen bedingt: 8,1% in der s.c. Gruppe gegenüber 4,4% in der i.v. Gruppe. Die übrigen SAEs zeigten ein ähnliches Verteilungsmuster und eine vergleichbare Häufigkeit über verschiedene Organkategorien. Die Autoren analysierten diesen Unterschied und kamen zu dem Schluss, dass die Prüfarzte vermutlich in dieser nicht verblindeten Studie eine konservativere Haltung gegenüber der experimentellen subkutanen Applikation einnahmen und Patientinnen daher häufiger stationär aufnahmen. Insgesamt waren die Sicherheitsprofile der fixen subkutanen Dosierung und der etablierten intravenösen Dosierung vergleichbar [30]. Für die fixe Dosierung zeigte sich keine Korrelation zwischen Körpergewicht und Wirksamkeit oder Nebenwirkungen [31].

### Überprüfung der Präferenz von Patienten und medizinischem Fachpersonal

Letztlich macht die Entwicklung einer subkutanen Formulierung nur Sinn, wenn diese in der klinischen Praxis von den Patienten auch tatsächlich als einfachere und komfortablere Alternative zur intravenösen Gabe bewertet wird. Für die subkutane Gabe von Trastuzumab wurde dies in der PrefHer-Studie prospektiv überprüft (PrefHer, registriert auf [clinical.trials.gov](http://clinical.trials.gov) unter NCT01401166), die systematisch die Präferenz von Patientinnen sowie die Zufriedenheit des medizinischen Personals mit der subkutanen Applikationsform im Vergleich zur intravenösen Gabe überprüfte. Dabei waren auch die Applikation mithilfe eines Einmalinjektionsgeräts sowie Zeitbedarf und Kosten der alternativen Verabreichungsformen Untersuchungsgegenstand. Die Ergebnisse deuten auf eine überzeugende Präferenz der Patientinnen für die subkutane Applikation von Trastuzumab hin. Danach bevorzugten 216 (91,5%) Patientinnen die subkutane Applikation gegenüber der intravenösen (95%-Konfidenzintervall 87,2–94,7%;  $p < 0,0001$ ). Als wichtigsten Grund nannten sie die Zeitersparnis durch die subkutane Verabreichung gefolgt von weniger Schmerzen [32]. Dabei war die effektive Behandlungszeit der Patienten und der Zeitbedarf des medizinischen Fachpersonals mit der subkutanen Gabe auch tatsächlich geringer [33].

16 Patienten bevorzugten die intravenöse Applikation (6,8%, 95%-KI 3,9–10,8). Als häufigster Grund wurden weniger Reaktionen auf die Infusion im Sinne von weniger Schmerzen, Hauteinblutungen und Reizungen angegeben. Auch das Behandlungsumfeld wurde 2-mal als Grund genannt [32]. Während der Cross-over-Phase wurden in dieser Studie 6 (2,5%) SAEs berichtet. Für alle wurde kein Zusammenhang mit der Studienmedikation angegeben [33]. Die Sicherheit von Trastuzumab s.c. wird derzeit in einer großen globalen Studie (SafeHer, registriert auf [clinicaltrials.gov](http://clinicaltrials.gov) unter NCT01566721) mit 2500 Patientinnen parallel in 2 Kohorten für die Injektion mittels Spritze und mittels Einmalinjektionsgerät durch den Patienten selbst in der adjuvanten Behandlungssituation überprüft.

### Einordnung der Daten zur subkutanen Anwendung von Trastuzumab

Am Beispiel Trastuzumab lässt sich aufzeigen, dass mittels Koformulierung mit rekombinanter humaner Hyaluronidase eine subkutane Verabreichung auch für größere Injektionsvolumina bei guter Bioverfügbarkeit und einer der intravenösen Applikation vergleichbaren Wirksamkeit sicher und effektiv realisiert werden kann. Die alternative subkutane Applikation von Trastuzumab in einer fixen Dosierung von 600 mg s.c. über 5 min zeigte im randomisierten Vergleich zur etablierten intravenösen Darreichungsform eine vergleichbare Pharmakokinetik, Wirksamkeit und Sicherheit und wurde von den Patientinnen aufgrund der für sie resultierenden Zeitersparnis und ihres weniger invasiven Charakters präferiert. Dies ging einher mit einem geringeren Zeitbedarf des medizinischen Fachpersonals.

Die Entwicklung alternativer subkutaner Verabreichungsformen für die onkologische Langzeittherapie mit monoklonalen Antikörpern stellt ein bisher nur unzureichend berücksichtigtes Bedürfnis der onkologischen Patienten dar. Im Interesse der Patienten sollten intensivere Anstrengungen unternommen werden, dass mehr subkutane Formulierungen monoklonaler Antikörper zur Verfügung stehen. Sie könnten als weniger invasive, vom realen Zeitaufwand signifikant reduzierte und flexiblere Verabreichungsformen zu einer höheren Qualität der gewonnenen Lebenszeit der onkologischen Patienten beitragen, die diese länger, flexibler und selbstbestimmter für ihre persönlichen Interessen nutzen können. Dies würde voraussichtlich auch ein flexibleres Zeitmanagement in Klinik oder Praxis ermöglichen. Letztlich stellen subkutane Applikationsformen jedoch nur echte Alternativen dar, wenn sie nicht zu deutlich höheren Kosten für die Gesellschaft führen. Dies gilt es mithilfe sorgfältig durchgeführter pharmakoökonomischer Studien sauber zu überprüfen. Es sollte nicht unerwähnt bleiben, dass es auch Patienten und Ärzte geben wird, die auch weiterhin eine intravenöse Verabreichung bevorzugen. Für manche Patienten stellt die mit der konventionellen intravenösen Verabreichung von mAKs verbundene längere Behandlungszeit auch eine intensivere Betreuung und eine größere Sicherheit dar, für die sie eine invasivere und längere Therapie akzeptieren. Auch die bestehenden Erstattungsregularien für unterschiedliche Therapieformen könnten durchaus einen Anreiz für die Bevorzugung der intravenösen gegenüber der subkutanen Verabreichungsform darstellen.

### Fazit

▼ Unser Artikel stellt eine Bestandsaufnahme zur subkutanen Anwendung von monoklonalen Antikörpern in der onkologischen Therapie und deren Herausforderungen dar. Bisher wird den Bedürfnissen onkologischer Patienten nach einer weniger invasiven und flexibleren Verabreichung nicht in angemessener Weise Rechnung getragen. Das Beispiel von Trastuzumab bei Patientinnen mit HER2-positivem Mammakarzinom zeigt, dass die Entwicklung alternativer subkutaner Applikationsformen monoklonaler Antikörper mit mindestens vergleichbarer Wirksamkeit und Verträglichkeit bei einer geringeren und effektiveren Nutzung medizinischer Ressourcen grundsätzlich möglich wäre.

### Interessenkonflikt

▼ Die Autoren erklären, dass innerhalb der vergangenen 3 Jahre folgende Tätigkeiten oder Unterstützungen vorlagen: CJ Honorare für Beratertätigkeit von Roche, Reisekostenunterstützung von Roche und Amgen, VM Honorare für Beratertätigkeit und Expertengutachten von Roche, Vorträge von Roche, Celgene, Pierre Fabre, Reisekostenunterstützung von GBG Forschungs-GmbH, CM Honorar für Durchführung von klinischen Auftragsstudien von Roche, SH Honorare für Beratertätigkeit von Roche, BA Honorare für Beratertätigkeit, Vorträge und Durchführung von klinischen Auftragsstudien von Roche, Reisekostenunterstützung von Roche.

### Literatur

- 1 Website der Deutschen Krebsgesellschaft. Brustkrebs – Erkrankungsverlauf. Online: [www.krebsgesellschaft.de](http://www.krebsgesellschaft.de); Stand: 15.10.2013
- 2 Faderl S, Ferrajoli A, Wierda W et al. Alemtuzumab by continuous intravenous infusion followed by subcutaneous injection plus rituximab in the treatment of patients with chronic lymphocytic leukemia recurrence. *Cancer* 2010; 116: 2360–2365
- 3 Hale G, Rebello P, Brettman LR et al. Blood concentrations of alemtuzumab and antiglobulin responses in patients with chronic lymphocytic leukemia after intravenous or subcutaneous routes of administration. *Blood* 2004; 104: 948–955
- 4 MabCampath Alemtuzumab, Zusammenfassung des EPAR für die Öffentlichkeit. Online: [http://www.ema.europa.eu/docs/de\\_DE/document\\_library/EPAR\\_-\\_Summary\\_for\\_the\\_public/human/000353/WC500025261.pdf](http://www.ema.europa.eu/docs/de_DE/document_library/EPAR_-_Summary_for_the_public/human/000353/WC500025261.pdf); Stand: 04.12.2013
- 5 Aue G, Lindorfer MA, Beum PV et al. Fractionated subcutaneous rituximab is well-tolerated and preserves CD20 expression on tumor cells in patients with chronic lymphocytic leukemia. *Haematologica* 2010; 95: 329–332
- 6 Davies A, Merli F, Mihaljevic B et al. Pharmacokinetics, safety, and overall response rate achieved with subcutaneous administration of rituximab in combination with chemotherapy were comparable with those achieved with intravenous administration in patients with follicular lymphoma in the first-line setting: stage 1 results of the phase 3 SABRINA study (BO22334). *Blood (ASH Annual Meeting Abstracts)* 2012; 120: 1629
- 7 Pressemitteilung F. Hoffmann-La Roche Ltd. vom 2. September 2013
- 8 Stopeck AT, Lipton A, Body JJ et al. Denosumab compared with zoledronic acid for the treatment of bone metastases in patients with advanced breast cancer: a randomized, double-blind study. *J Clin Oncol* 2010; 28: 5132–5139
- 9 Fizazi K, Carducci M, Smith M et al. Denosumab versus zoledronic acid for treatment of bone metastases in men with castration-resistant prostate cancer: a randomised, double-blind study. *Lancet* 2011; 377: 813–822
- 10 Henry DH, Costa L, Goldwasser F et al. Randomized, double-blind study of denosumab versus zoledronic acid in the treatment of bone metastases in patients with advanced cancer (excluding breast and prostate cancer) or multiple myeloma. *J Clin Oncol* 2011; 29: 1125–1132

- 11 Smith MR, Saad F, Coleman R et al. Denosumab and bone-metastasis-free survival in men with castration-resistant prostate cancer: results of a phase 3, randomised, placebo-controlled trial. *Lancet* 2012; 379: 39–46
- 12 DKG. Interdisziplinäre S3-Leitlinie für die Diagnostik, Therapie und Nachsorge des Mammakarzinoms. Langversion 3.0, Aktualisierung 2012. Online: [http://www.krebsgesellschaft.de/download/S3\\_Brustkrebs\\_Update\\_2012\\_OL\\_Langversion.pdf](http://www.krebsgesellschaft.de/download/S3_Brustkrebs_Update_2012_OL_Langversion.pdf)
- 13 AGO Empfehlungen für die Diagnostik und Therapie von Patientinnen mit primärem und metastasiertem Brustkrebs, Version 2012.1D. Online: <http://www.ago-online.de>
- 14 Cardoso F, Harbeck N, Fallowfield L et al. Locally recurrent or metastatic breast cancer: ESMO Clinical Practice Guidelines for diagnosis, treatment and follow-up. *Ann Oncol* 2012; 23: vi11–vi19
- 15 Dahabreh IJ, Linardou H, Siannis F et al. Trastuzumab in the adjuvant treatment of early-stage breast cancer: a systematic review and meta-analysis of randomized controlled trials. *Oncologist* 2008; 13: 620–630
- 16 Harris CA, Ward RL, Dobbins A et al. The efficacy of HER2-targeted agents in metastatic breast cancer: a meta-analysis. *Ann Oncol* 2011; 22: 1308–1317
- 17 Slamon DJ, Leyland-Jones B, Shak S et al. Use of chemotherapy plus a monoclonal antibody against HER2 for metastatic breast cancer that overexpresses HER2. *N Engl J Med* 2001; 344: 783–792
- 18 Valero V, Forbes J, Pegram MD et al. Multicenter phase III randomized trial comparing docetaxel and trastuzumab with docetaxel, carboplatin, and trastuzumab as first-line chemotherapy for patients with HER2-gene-amplified metastatic breast cancer (BCIRG 007 study): two highly active therapeutic regimens. *J Clin Oncol* 2011; 29: 149–156
- 19 Wardley AM, Pivrot X, Morales-Vasquez F. Randomized phase II trial of first-line trastuzumab plus docetaxel and capecitabine compared with trastuzumab plus docetaxel in HER2-positive metastatic breast cancer. *J Clin Oncol* 2010; 28: 976–983
- 20 Fachinformation Herceptin®, Fassung vom Januar 2013
- 21 Xgeva®, Zusammenfassung der Merkmale des Arzneimittels, Fassung vom 11.09.2012. Online: [http://www.ema.europa.eu/ema/index.jsp?curl=pages/includes/document/document\\_detail.jsp?webContentId=WC500110381&mid=WC0b01ac058009a3dc](http://www.ema.europa.eu/ema/index.jsp?curl=pages/includes/document/document_detail.jsp?webContentId=WC500110381&mid=WC0b01ac058009a3dc)
- 22 Bittner B, Richter WF, Hourcade-Potelleret F et al. Development of a subcutaneous formulation for trastuzumab – nonclinical and clinical bridging approach to the approved intravenous dosing regimen. *Arzneimittelforschung* 2012; 62: 401–409
- 23 Haller F. Converting intravenous dosing to subcutaneous dosing with recombinant human hyaluronidase. *Pharm Tech* 2007; 10: 861–864
- 24 Watson D. Hyaluronidase. *Br J Anaesth* 1993; 71: 422–425
- 25 Bookbinder LH, Hofer A, Haller MF et al. A recombinant human enzyme for enhanced interstitial transport of therapeutics. *J Control Release* 2006; 114: 230–241
- 26 Frost GI. Recombinant human hyaluronidase (rHuPH20): an enabling platform for subcutaneous drug and fluid administration. *Expert Opin Drug Deliv* 2007; 4: 427–440
- 27 Wynne C, Harvey V, Schwabe C et al. Comparison of subcutaneous and intravenous administration of trastuzumab: A phase I/II trial in healthy male volunteers and patients with HER2-positive breast cancer. *J Clin Pharmacol* 2013; 53: 192–201
- 28 Pegram M, Hsu S, Lewis G et al. Inhibitory effects of combinations of HER-2/neu antibody and chemotherapeutic agents used for treatment of human breast cancers. *Oncogene* 1999; 18: 2241–2251
- 29 Hourcade-Potelleret F, Lemenuel-Diot A, McIntyre C et al. Use of a population pharmacokinetic approach for the clinical development of a fixed-dose subcutaneous formulation of trastuzumab. *CPT Pharmacometrics Syst Pharmacol* 2014; 3: e87
- 30 Ismael G, Hegg R, Muehlbauer S et al. Subcutaneous versus intravenous administration of (neo)adjuvant trastuzumab in patients with HER2-positive, clinical stage I–III breast cancer (HannaH study): a phase 3, open-label, multicentre, randomised trial. *Lancet Oncol* 2012; 13: 869–878
- 31 Melichar B, Stroyakovskiy D, Ahn JN et al. Pathological complete response to trastuzumab subcutaneous fixed-dose formulation in the HannaH study: Subgroup analysis of patient demographics and tumor characteristics and influence of body weight and serum trough concentration of trastuzumab. Präsentiert als Poster auf dem ESMO-Kongress in Wien 2012
- 32 Pivrot X, Gligorov J, Müller V et al. Preference for subcutaneous or intravenous administration of trastuzumab in patients with HER2-positive early breast cancer (PrefHer): an open-label randomised study. *Lancet Oncol* 2013; 14: 962–970
- 33 De Cock E, Semiglazov V, Lopez-Vivanco G et al. Time savings with trastuzumab subcutaneous vs. intravenous administration: a time-and-motion study. Präsentiert als Poster auf der International Breast Cancer Conference St. Gallen 2013, Abstract P209, 2013
